# Supplementary material for: Comparative analysis of the tear protein profile in herpes simplex virus type 1 epithelial keratitis
Source: BMC Ophthalmol. 2020 Aug 31;20:355. doi: 10.1186/s12886-020-01626-3 (PMC7461310; doi:10.1186/s12886-020-01626-3)
Supplement: Supplementary file 3 — Additional file 3: Table S3. The 326 unique proteins of HSV-1 epithelial keratitis patients. [file 12886_2020_1626_MOESM3_ESM.xlsx]

## Sheet: Unique proteins
S3 Table. The 326 unique proteins of HSV-1 epithelial keratitis patients.
Gene Symbol	Gene ID	Description	Number of spectra
			Patient-1	Patient-2	Patient-3
ABCF1	23	ATP binding cassette subfamily F member 1(ABCF1)	4	0	0
ACAA1	30	acetyl-CoA acyltransferase 1(ACAA1)	0	1	0
ACADVL	37	acyl-CoA dehydrogenase, very long chain(ACADVL)	0	7	0
ACAT1	38	acetyl-CoA acetyltransferase 1(ACAT1)	1	6	0
ACAT2	39	acetyl-CoA acetyltransferase 2(ACAT2)	0	3	0
ACLY	47	ATP citrate lyase(ACLY)	0	1	1
ACTG2	72	actin, gamma 2, smooth muscle, enteric(ACTG2)	0	1	1
ACTR1B	10120	ARP1 actin-related protein 1 homolog B, centractin beta(ACTR1B)	0	5	0
ADD3	120	adducin 3(ADD3)	0	1	1
ADIRF	10974	adipogenesis regulatory factor(ADIRF)	0	1	0
ADRM1	11047	adhesion regulating molecule 1(ADRM1)	0	32	0
AHCY	191	adenosylhomocysteinase(AHCY)	0	2	5
AHSA1	10598	activator of Hsp90 ATPase activity 1(AHSA1)	0	1	0
AKR1C1	1645	aldo-keto reductase family 1 member C1(AKR1C1)	7	0	6
ALDH1A1	216	aldehyde dehydrogenase 1 family member A1(ALDH1A1)	2	4	2
ALDH1A3	220	aldehyde dehydrogenase 1 family member A3(ALDH1A3)	8	14	14
ALDH7A1	501	aldehyde dehydrogenase 7 family member A1(ALDH7A1)	14	1	0
ALDH9A1	223	aldehyde dehydrogenase 9 family member A1(ALDH9A1)	0	2	0
ALDOA	226	aldolase, fructose-bisphosphate A(ALDOA)	0	5	2
ANG	283	angiogenin(ANG)	0	2	0
ANXA3	306	annexin A3(ANXA3)	0	4	3
ANXA4	307	annexin A4(ANXA4)	0	1	1
ANXA5	308	annexin A5(ANXA5)	0	3	3
AP2A1	160	adaptor related protein complex 2 alpha 1 subunit(AP2A1)	0	2	2
AP2A2	161	adaptor related protein complex 2 alpha 2 subunit(AP2A2)	0	3	5
ARF5	381	ADP ribosylation factor 5(ARF5)	12	0	1
ARID1A	8289	AT-rich interaction domain 1A(ARID1A)	0	4	0
ARID4A	5926	AT-rich interaction domain 4A(ARID4A)	2	0	0
ARPC1B	10095	actin related protein 2/3 complex subunit 1B(ARPC1B)	0	2	0
ARSA	410	arylsulfatase A(ARSA)	8	0	6
ASPH	444	aspartate beta-hydroxylase(ASPH)	15	11	7
ASS1	445	argininosuccinate synthase 1(ASS1)	2	1	0
ATOX1	475	antioxidant 1 copper chaperone(ATOX1)	2	3	8
ATP6AP2	10159	ATPase H+ transporting accessory protein 2(ATP6AP2)	0	1	0
ATP6V1A	523	ATPase H+ transporting V1 subunit A(ATP6V1A)	18	12	0
ATP6V1B2	526	ATPase H+ transporting V1 subunit B2(ATP6V1B2)	1	0	0
ATP6V1C1	528	ATPase H+ transporting V1 subunit C1(ATP6V1C1)	1	4	0
ATP6V1E1	529	ATPase H+ transporting V1 subunit E1(ATP6V1E1)	4	8	0
B3GNT3	10331	UDP-GlcNAc:betaGal beta-1,3-N-acetylglucosaminyltransferase 3(B3GNT3)	0	1	3
B4GALT1	2683	beta-1,4-galactosyltransferase 1(B4GALT1)	0	3	2
B4GALT4	8702	beta-1,4-galactosyltransferase 4(B4GALT4)	0	0	2
BAG1	573	BCL2 associated athanogene 1(BAG1)	0	1	0
BAG3	9531	BCL2 associated athanogene 3(BAG3)	0	65	12
BAP1	8314	BRCA1 associated protein 1(BAP1)	0	7	0
BASP1	10409	brain abundant membrane attached signal protein 1(BASP1)	0	1	0
BCAR1	9564	BCAR1, Cas family scaffolding protein(BCAR1)	25	36	2
BFSP1	631	beaded filament structural protein 1(BFSP1)	6	15	5
BRAF	673	B-Raf proto-oncogene, serine/threonine kinase(BRAF)	2	4	0
BTF3	689	basic transcription factor 3(BTF3)	0	4	0
C1QC	714	complement C1q C chain(C1QC)	14	122	63
C1S	716	complement C1s(C1S)	0	4	0
C4A	721	complement C4B (Chido blood group)(C4B)	2	6	6
C4BPA	722	complement component 4 binding protein alpha(C4BPA)	1	8	3
C5	727	complement C5(C5)	13	18	3
C8A	731	complement C8 alpha chain(C8A)	5	8	2
CA8	767	carbonic anhydrase 8(CA8)	0	91	78
CALR	811	calreticulin(CALR)	3	82	56
CALU	813	calumenin(CALU)	32	23	0
CAMK2D	817	calcium/calmodulin dependent protein kinase II delta(CAMK2D)	0	0	2
CAMP	820	cathelicidin antimicrobial peptide(CAMP)	20	59	45
CAP1	10487	adenylate cyclase associated protein 1(CAP1)	0	2	0
CAPG	822	capping actin protein, gelsolin like(CAPG)	3	0	8
CAPNS1	826	calpain small subunit 1(CAPNS1)	8	0	9
CAPS	828	calcyphosine(CAPS)	23	11	12
CAPZA1	829	capping actin protein of muscle Z-line alpha subunit 1(CAPZA1)	2	6	4
CASP10	843	caspase 10(CASP10)	33	26	45
CASP4	837	caspase 4(CASP4)	7	4	8
CASP6	839	caspase 6(CASP6)	17	11	28
CBR3	874	carbonyl reductase 3(CBR3)	41	3	62
CCT3	7203	chaperonin containing TCP1 subunit 3(CCT3)	0	2	0
CCT6A	908	chaperonin containing TCP1 subunit 6A(CCT6A)	19	2	27
CCT7	10574	chaperonin containing TCP1 subunit 7(CCT7)	0	1	0
CCT8	10694	chaperonin containing TCP1 subunit 8(CCT8)	11	1	0
CD14	929	CD14 molecule(CD14)	4	0	31
CD5L	922	CD5 molecule like(CD5L)	26	6	56
CD81	975	CD81 molecule(CD81)	0	7	16
CDC42	998	cell division cycle 42(CDC42)	7	0	12
CDC5L	988	cell division cycle 5 like(CDC5L)	0	11	9
CIB1	10519	calcium and integrin binding 1(CIB1)	0	1	0
CKMT1B	1159	creatine kinase, mitochondrial 1B(CKMT1B)	0	24	6
CNPY3	10695	canopy FGF signaling regulator 3(CNPY3)	0	1	0
COL6A1	1291	collagen type VI alpha 1 chain(COL6A1)	1	0	6
COMT	1312	catechol-O-methyltransferase(COMT)	13	0	14
COPA	1314	coatomer protein complex subunit alpha(COPA)	30	5	15
COPB1	1315	coatomer protein complex subunit beta 1(COPB1)	20	26	7
COPB2	9276	coatomer protein complex subunit beta 2(COPB2)	53	0	69
CORO1A	11151	coronin 1A(CORO1A)	0	2	0
COX6B1	1340	cytochrome c oxidase subunit 6B1(COX6B1)	53	0	21
CPD	1362	carboxypeptidase D(CPD)	16	9	4
CPQ	10404	carboxypeptidase Q(CPQ)	0	1	0
CRKL	1399	CRK like proto-oncogene, adaptor protein(CRKL)	7	5	2
CST1	1469	cystatin SN(CST1)	12	0	2
CST3	1471	cystatin C(CST3)	0	3	0
CST6	1474	cystatin E/M(CST6)	2	3	2
CSTA	1475	cystatin A(CSTA)	0	1	1
CTPS1	1503	CTP synthase 1(CTPS1)	3	1	0
CTSB	1508	cathepsin B(CTSB)	1	0	0
CTSD	1509	cathepsin D(CTSD)	3	2	0
CTSS	1520	cathepsin S(CTSS)	1	5	0
CTSV	1515	cathepsin V(CTSV)	2	2	0
DCTN1	1639	dynactin subunit 1(DCTN1)	6	3	3
DEFB4A	1673	defensin beta 4A(DEFB4A)	116	104	77
DNAJA2	10294	DnaJ heat shock protein family (Hsp40) member A2(DNAJA2)	0	31	0
DNAJB9	4189	DnaJ heat shock protein family (Hsp40) member B9(DNAJB9)	0	7	0
DNPH1	10591	2'-deoxynucleoside 5'-phosphate N-hydrolase 1(DNPH1)	8	1	0
DPYSL3	1809	dihydropyrimidinase like 3(DPYSL3)	0	1	1
DRG2	1819	developmentally regulated GTP binding protein 2(DRG2)	67	24	11
DUT	1854	deoxyuridine triphosphatase(DUT)	1	1	0
ECM1	1893	extracellular matrix protein 1(ECM1)	148	0	132
EEF1G	1937	eukaryotic translation elongation factor 1 gamma(EEF1G)	56	60	34
EGF	1950	epidermal growth factor(EGF)	135	105	53
EIF1	10209	eukaryotic translation initiation factor 1(EIF1)	0	31	0
EIF3C	8663	eukaryotic translation initiation factor 3 subunit C(EIF3C)	0	6	8
EIF3D	8664	eukaryotic translation initiation factor 3 subunit D(EIF3D)	1	0	0
EIF3G	8666	eukaryotic translation initiation factor 3 subunit G(EIF3G)	0	5	0
EIF3J	8669	eukaryotic translation initiation factor 3 subunit J(EIF3J)	0	3	0
EIF3S6	3646	eukaryotic translation initiation factor 3 subunit E(EIF3E)	2	3	7
EIF4E	1977	eukaryotic translation initiation factor 4E(EIF4E)	17	12	8
EIF4G1	1981	eukaryotic translation initiation factor 4 gamma 1(EIF4G1)	13	16	16
EIF4H	7458	eukaryotic translation initiation factor 4H(EIF4H)	0	0	3
EIF5	1983	eukaryotic translation initiation factor 5(EIF5)	3	0	2
EIF5B	9669	eukaryotic translation initiation factor 5B(EIF5B)	0	2	0
EIF6	3692	eukaryotic translation initiation factor 6(EIF6)	2	3	8
ELA2	1991	elastase, neutrophil expressed(ELANE)	4	7	1
ELOB	6923	transcription elongation factor B subunit 2(TCEB2)	0	2	2
EPB41	2035	erythrocyte membrane protein band 4.1(EPB41)	13	16	3
EPCAM	4072	epithelial cell adhesion molecule(EPCAM)	0	11	0
EPRS	2058	glutamyl-prolyl-tRNA synthetase(EPRS)	0	10	3
ERP29	10961	endoplasmic reticulum protein 29(ERP29)	0	1	21
EXT1	2131	exostosin glycosyltransferase 1(EXT1)	2	2	5
FABP4	2167	fatty acid binding protein 4(FABP4)	8	0	4
FAM13A	10144	family with sequence similarity 13 member A(FAM13A)	0	1	0
FBLN5	10516	fibulin 5(FBLN5)	0	1	0
FKBP2	2286	FK506 binding protein 2(FKBP2)	0	4	1
FOLR1	2348	folate receptor 1(FOLR1)	4	0	56
FUT6	2528	fucosyltransferase 6(FUT6)	0	3	2
GALNT2	2590	polypeptide N-acetylgalactosaminyltransferase 2(GALNT2)	4	0	1
GAS1	2619	growth arrest specific 1(GAS1)	3	8	17
GCHFR	2644	GTP cyclohydrolase I feedback regulator(GCHFR)	0	0	13
GGT2	2678	gamma-glutamyltransferase 1(GGT1)	0	2	63
GLO1	2739	glyoxalase I(GLO1)	0	2	0
GLRX	2745	glutaredoxin(GLRX)	0	0	9
GNB2	2783	G protein subunit beta 2(GNB2)	0	0	97
GPR56	9289	adhesion G protein-coupled receptor G1(ADGRG1)	51	0	12
GSR	2936	glutathione-disulfide reductase(GSR)	3	1	5
GSTM1	2944	glutathione S-transferase mu 1(GSTM1)	0	0	17
GSTP1	2950	glutathione S-transferase pi 1(GSTP1)	0	0	1
GUK1	2987	guanylate kinase 1(GUK1)	4	1	5
HDAC4	9759	histone deacetylase 4(HDAC4)	0	3	0
HDLBP	3069	high density lipoprotein binding protein(HDLBP)	4	0	4
HIBADH	11112	3-hydroxyisobutyrate dehydrogenase(HIBADH)	0	3	0
HLA-C	3107	major histocompatibility complex, class I, C(HLA-C)	3	0	4
HMGA1	3159	high mobility group AT-hook 1(HMGA1)	0	4	0
HMGB1P1	10357	high mobility group box 1 pseudogene 1(HMGB1P1)	0	1	0
HMGN1	3150	high mobility group nucleosome binding domain 1(HMGN1)	0	0	5
HNRNPC	3183	heterogeneous nuclear ribonucleoprotein C (C1/C2)(HNRNPC)	0	2	0
HNRNPF	3185	heterogeneous nuclear ribonucleoprotein F(HNRNPF)	0	13	0
HNRNPM	4670	heterogeneous nuclear ribonucleoprotein M(HNRNPM)	0	3	0
HSBP1	3281	heat shock factor binding protein 1(HSBP1)	65	11	43
HSPA5	3309	heat shock protein family A (Hsp70) member 5(HSPA5)	12	23	0
HSPD1	3329	heat shock protein family D (Hsp60) member 1(HSPD1)	2	0	0
IDH2	3418	isocitrate dehydrogenase (NADP(+)) 2, mitochondrial(IDH2)	0	0	1
IDS	3423	iduronate 2-sulfatase(IDS)	1	1	1
IFI16	3428	interferon gamma inducible protein 16(IFI16)	2	3	2
IFIT1	3434	interferon induced protein with tetratricopeptide repeats 1(IFIT1)	2	3	6
IGFBP3	3486	insulin like growth factor binding protein 3(IGFBP3)	10	0	0
IGFBP7	3490	insulin like growth factor binding protein 7(IGFBP7)	0	0	32
IL12B	3593	interleukin 12B(IL12B)	36	28	28
IL1A	3552	interleukin 1 alpha(IL1A)	112	39	56
IL6	3569	interleukin 6(IL6)	34	9	0
IMPDH2	3615	inosine monophosphate dehydrogenase 2(IMPDH2)	13	5	0
ITIH2	3698	inter-alpha-trypsin inhibitor heavy chain 2(ITIH2)	7	10	9
ITPA	3704	inosine triphosphatase(ITPA)	7	0	8
JCHAIN	3512	joining chain of multimeric IgA and IgM(JCHAIN)	4	4	4
KCND2	3751	potassium voltage-gated channel subfamily D member 2(KCND2)	14	20	12
LAMTOR5	10542	late endosomal/lysosomal adaptor, MAPK and MTOR activator 5(LAMTOR5)	0	1	0
LFNG	3955	LFNG O-fucosylpeptide 3-beta-N-acetylglucosaminyltransferase(LFNG)	0	2	0
LGALS7B	3963	galectin 7(LGALS7)	0	4	0
LPP	4026	LIM domain containing preferred translocation partner in lipoma(LPP)	0	77	0
LRBA	987	LPS responsive beige-like anchor protein(LRBA)	0	13	57
LTBP3	4054	latent transforming growth factor beta binding protein 3(LTBP3)	0	1	0
MAPK1	5594	mitogen-activated protein kinase 1(MAPK1)	16	0	0
MATR3	9782	matrin 3(MATR3)	0	5	0
MELTF	4241	melanotransferrin(MELTF)	0	10	0
MGAT2	4247	mannosyl (alpha-1,6-)-glycoprotein beta-1,2-N-acetylglucosaminyltransferase(MGAT2)	0	3	0
MMP14	4323	matrix metallopeptidase 14(MMP14)	6	0	0
MSRA	4482	methionine sulfoxide reductase A(MSRA)	4	0	0
MUC1	4582	mucin 1, cell surface associated(MUC1)	0	2	0
MUC12	10071	mucin 12, cell surface associated(MUC12)	0	3	0
MYH8	4626	myosin heavy chain 8(MYH8)	0	8	0
MYL12A	10627	myosin light chain 12A(MYL12A)	0	2	0
MYRF	745	myelin regulatory factor(MYRF)	1	16	15
NAGLU	4669	N-acetyl-alpha-glucosaminidase(NAGLU)	32	1	0
NCAM1	4684	neural cell adhesion molecule 1(NCAM1)	0	6	0
NMT2	9397	N-myristoyltransferase 2(NMT2)	0	2	0
NUBP1	4682	nucleotide binding protein 1(NUBP1)	0	6	0
NUDT2	318	nudix hydrolase 2(NUDT2)	5	3	2
OS9	10956	OS9, endoplasmic reticulum lectin(OS9)	0	1	0
PABPC3	5042	poly(A) binding protein cytoplasmic 3(PABPC3)	7	0	0
PAPSS1	9061	3'-phosphoadenosine 5'-phosphosulfate synthase 1(PAPSS1)	0	62	0
PCBP1	5093	poly(rC) binding protein 1(PCBP1)	0	6	0
PCBP2	5094	poly(rC) binding protein 2(PCBP2)	0	6	0
PCDHGC3	5098	protocadherin gamma subfamily C, 3(PCDHGC3)	0	8	0
PCMT1	5110	protein-L-isoaspartate (D-aspartate) O-methyltransferase(PCMT1)	1	0	0
PCNA	5111	proliferating cell nuclear antigen(PCNA)	0	3	0
PCNT	5116	pericentrin(PCNT)	3	0	0
PCOLCE	5118	procollagen C-endopeptidase enhancer(PCOLCE)	0	0	5
PDLIM1	9124	PDZ and LIM domain 1(PDLIM1)	0	2	1
PFDN1	5201	prefoldin subunit 1(PFDN1)	0	6	0
PFDN4	5203	prefoldin subunit 4(PFDN4)	0	6	0
PFDN5	5204	prefoldin subunit 5(PFDN5)	0	1	0
PKM	5315	pyruvate kinase, muscle(PKM)	0	6	0
PLCD1	5333	phospholipase C delta 1(PLCD1)	0	4	0
PLOD1	5351	procollagen-lysine,2-oxoglutarate 5-dioxygenase 1(PLOD1)	0	15	0
PLOD2	5352	procollagen-lysine,2-oxoglutarate 5-dioxygenase 2(PLOD2)	0	6	0
PLS3	5358	plastin 3(PLS3)	0	1	0
PLTP	5360	phospholipid transfer protein(PLTP)	1	1	0
POLQ	10721	DNA polymerase theta(POLQ)	0	1	0
POLR1C	9533	RNA polymerase I subunit C(POLR1C)	0	98	3
POLR2H	5437	RNA polymerase II subunit H(POLR2H)	0	2	0
POLR2I	5438	RNA polymerase II subunit I(POLR2I)	1	3	4
PPIA	5478	peptidylprolyl isomerase A(PPIA)	5	1	0
PPP1R11	6992	protein phosphatase 1 regulatory inhibitor subunit 11(PPP1R11)	5	1	1
PPP1R7	5510	protein phosphatase 1 regulatory subunit 7(PPP1R7)	6	0	0
PPP2CA	5515	protein phosphatase 2 catalytic subunit alpha(PPP2CA)	1	0	0
PPP2R1A	5518	protein phosphatase 2 scaffold subunit Aalpha(PPP2R1A)	0	0	2
PPP2R2A	5520	protein phosphatase 2 regulatory subunit Balpha(PPP2R2A)	7	0	0
PRDX2	7001	peroxiredoxin 2(PRDX2)	7	2	1
PRDX3	10935	peroxiredoxin 3(PRDX3)	24	1	0
PRDX6	9588	peroxiredoxin 6(PRDX6)	1	35	6
PRKACA	5566	protein kinase cAMP-activated catalytic subunit alpha(PRKACA)	0	7	0
PRKCD	5580	protein kinase C delta(PRKCD)	7	0	0
PRMT1	3276	protein arginine methyltransferase 1(PRMT1)	1	2	0
PRTN3	5657	proteinase 3(PRTN3)	4	0	0
PSMA3	5684	proteasome subunit alpha 3(PSMA3)	10	0	0
PSMC1	5700	proteasome 26S subunit, ATPase 1(PSMC1)	3	0	0
PSMC2	5701	proteasome 26S subunit, ATPase 2(PSMC2)	2	0	0
PSMC3	5702	proteasome 26S subunit, ATPase 3(PSMC3)	11	0	0
PSMD12	5718	proteasome 26S subunit, non-ATPase 12(PSMD12)	1	0	0
PSMD13	5719	proteasome 26S subunit, non-ATPase 13(PSMD13)	2	0	0
PSMD2	5708	proteasome 26S subunit, non-ATPase 2(PSMD2)	2	0	0
PSMD4	5710	proteasome 26S subunit, non-ATPase 4(PSMD4)	1	0	0
PTPA	5524	protein phosphatase 2 phosphatase activator(PTPA)	15	0	0
PTPRB	5787	protein tyrosine phosphatase, receptor type B(PTPRB)	3	0	0
PTTG1IP	754	pituitary tumor-transforming 1 interacting protein(PTTG1IP)	12	32	111
PURA	5813	purine rich element binding protein A(PURA)	4	0	0
RAB11B	9230	RAB11B, member RAS oncogene family(RAB11B)	0	2	1
RAB5C	5878	RAB5C, member RAS oncogene family(RAB5C)	1	3	0
RAB7A	7879	RAB7A, member RAS oncogene family(RAB7A)	63	66	46
RAD21	5885	RAD21 cohesin complex component(RAD21)	1	0	0
RAN	5901	RAN, member RAS oncogene family(RAN)	12	0	0
RARRES2	5919	retinoic acid receptor responder 2(RARRES2)	2	0	0
RBP1	5947	retinol binding protein 1(RBP1)	3	0	0
RIPK1	8737	receptor interacting serine/threonine kinase 1(RIPK1)	11	0	0
RNASET2	8635	ribonuclease T2(RNASET2)	2	12	0
RNF112	7732	ring finger protein 112(RNF112)	0	5	1
RPE	6120	ribulose-5-phosphate-3-epimerase(RPE)	3	0	0
RPL10A	4736	ribosomal protein L10a(RPL10A)	12	0	15
RPL23	9349	ribosomal protein L23(RPL23)	1	11	3
RPLP0	6175	ribosomal protein lateral stalk subunit P0(RPLP0)	2	0	0
RPS3	6188	ribosomal protein S3(RPS3)	1	0	0
RPS4X	6191	ribosomal protein S4, X-linked(RPS4X)	0	13	0
RPS5	6193	ribosomal protein S5(RPS5)	0	3	0
RPSA	3921	ribosomal protein SA(RPSA)	0	6	0
RSU1	6251	Ras suppressor protein 1(RSU1)	1	0	0
RYR2	6262	ryanodine receptor 2(RYR2)	0	2	0
S100A13	6284	S100 calcium binding protein A13(S100A13)	0	0	18
S100A4	6275	S100 calcium binding protein A4(S100A4)	34	5	54
S100A6	6277	S100 calcium binding protein A6(S100A6)	20	45	23
S100A7	6278	S100 calcium binding protein A7(S100A7)	0	2	0
S100A8	6279	S100 calcium binding protein A8(S100A8)	21	13	0
S100A9	6280	S100 calcium binding protein A9(S100A9)	0	0	2
SAA2	6288	serum amyloid A1(SAA1)	0	0	5
SCGB1D2	10647	secretoglobin family 1D member 2(SCGB1D2)	0	1	0
SCGB2A2	4250	secretoglobin family 2A member 2(SCGB2A2)	0	2	0
SEC13	6396	SEC13 homolog, nuclear pore and COPII coat complex component(SEC13)	0	0	4
SELENOF	9403	selenoprotein F(SELENOF)	0	3	0
SERPINA3	12	serpin family A member 3(SERPINA3)	5	0	0
SERPINA7	6906	serpin family A member 7(SERPINA7)	0	0	1
SERPINB13	5275	serpin family B member 13(SERPINB13)	8	0	0
SERPINB3	6317	serpin family B member 3(SERPINB3)	0	0	3
SERPINB5	5268	serpin family B member 5(SERPINB5)	0	9	1
SERPINB6	5269	serpin family B member 6(SERPINB6)	0	35	18
SERPINC1	462	serpin family C member 1(SERPINC1)	0	1	5
SERPIND1	3053	serpin family D member 1(SERPIND1)	11	0	17
SERPINF1	5176	serpin family F member 1(SERPINF1)	0	1	7
SERPINF2	5345	serpin family F member 2(SERPINF2)	0	2	0
SGCB	6443	sarcoglycan beta(SGCB)	0	0	7
SMARCE1	6605	SWI/SNF related, matrix associated, actin dependent regulator of chromatin, subfamily e, member 1(SMARCE1)	0	0	5
SMPDL3A	10924	sphingomyelin phosphodiesterase acid like 3A(SMPDL3A)	4	1	0
SNAP91	9892	synaptosome associated protein 91(SNAP91)	0	28	0
SNCG	6623	synuclein gamma(SNCG)	0	0	1
SNX3	8724	sorting nexin 3(SNX3)	5	0	0
SORBS1	10580	sorbin and SH3 domain containing 1(SORBS1)	0	1	0
SPAG9	9043	sperm associated antigen 9(SPAG9)	1	0	0
SRP14	6727	signal recognition particle 14(SRP14)	0	0	1
ST1A5	6818	sulfotransferase family 1A member 3(SULT1A3)	0	0	1
ST3GAL4	6484	ST3 beta-galactoside alpha-2,3-sialyltransferase 4(ST3GAL4)	0	0	1
ST3GAL6	10402	ST3 beta-galactoside alpha-2,3-sialyltransferase 6(ST3GAL6)	0	1	0
SUCLG1	8802	succinate-CoA ligase alpha subunit(SUCLG1)	1	0	0
SUCLG2	8801	succinate-CoA ligase GDP-forming beta subunit(SUCLG2)	1	0	0
TACC2	10579	transforming acidic coiled-coil containing protein 2(TACC2)	2	1	0
TAF10	6881	TATA-box binding protein associated factor 10(TAF10)	0	0	2
TCN2	6948	transcobalamin 2(TCN2)	0	2	2
THBS1	7057	thrombospondin 1(THBS1)	0	2	1
THOP1	7064	thimet oligopeptidase 1(THOP1)	0	5	0
TIMP2	7077	TIMP metallopeptidase inhibitor 2(TIMP2)	0	3	4
TLR2	7097	toll like receptor 2(TLR2)	1	16	17
TNNI3	7137	troponin I3, cardiac type(TNNI3)	0	0	5
TNXB	7148	tenascin XB(TNXB)	0	1	2
TOR1A	1861	torsin family 1 member A(TOR1A)	0	34	12
TPI1	7167	triosephosphate isomerase 1(TPI1)	0	1	0
TPM3	7170	tropomyosin 3(TPM3)	0	1	0
TSC22D1	8848	TSC22 domain family member 1(TSC22D1)	1	0	0
TSG101	7251	tumor susceptibility 101(TSG101)	0	2	0
TSHZ1	10194	teashirt zinc finger homeobox 1(TSHZ1)	0	1	0
TTC1	7265	tetratricopeptide repeat domain 1(TTC1)	0	2	0
TUBB4B	10383	tubulin beta 4B class IVb(TUBB4B)	0	1	32
UBE2D3	7323	ubiquitin conjugating enzyme E2 D3(UBE2D3)	0	0	3
UPF1	5976	UPF1, RNA helicase and ATPase(UPF1)	1	0	0
UROD	7389	uroporphyrinogen decarboxylase(UROD)	0	0	3
VASP	7408	vasodilator-stimulated phosphoprotein(VASP)	3	0	0
VEGFA	7422	vascular endothelial growth factor A	3	0	0
VPS26A	9559	VPS26, retromer complex component A(VPS26A)	0	36	2
XRCC5	7520	X-ray repair cross complementing 5(XRCC5)	3	0	0
ARPC2	10109	actin related protein 2/3 complex subunit 2(ARPC2)	0	0	1
